# Supplementary material for: Spatiotemporal Dynamics of the HIV-1 Subtype G Epidemic in West and Central Africa
Source: PLOS journal article supplement (doi:10.1371/journal.pone.0098908), 2014-06-11
Supplement: S1 (10.1371/journal.pone.0098908.s001) [file journal.pone.0098908.s001]

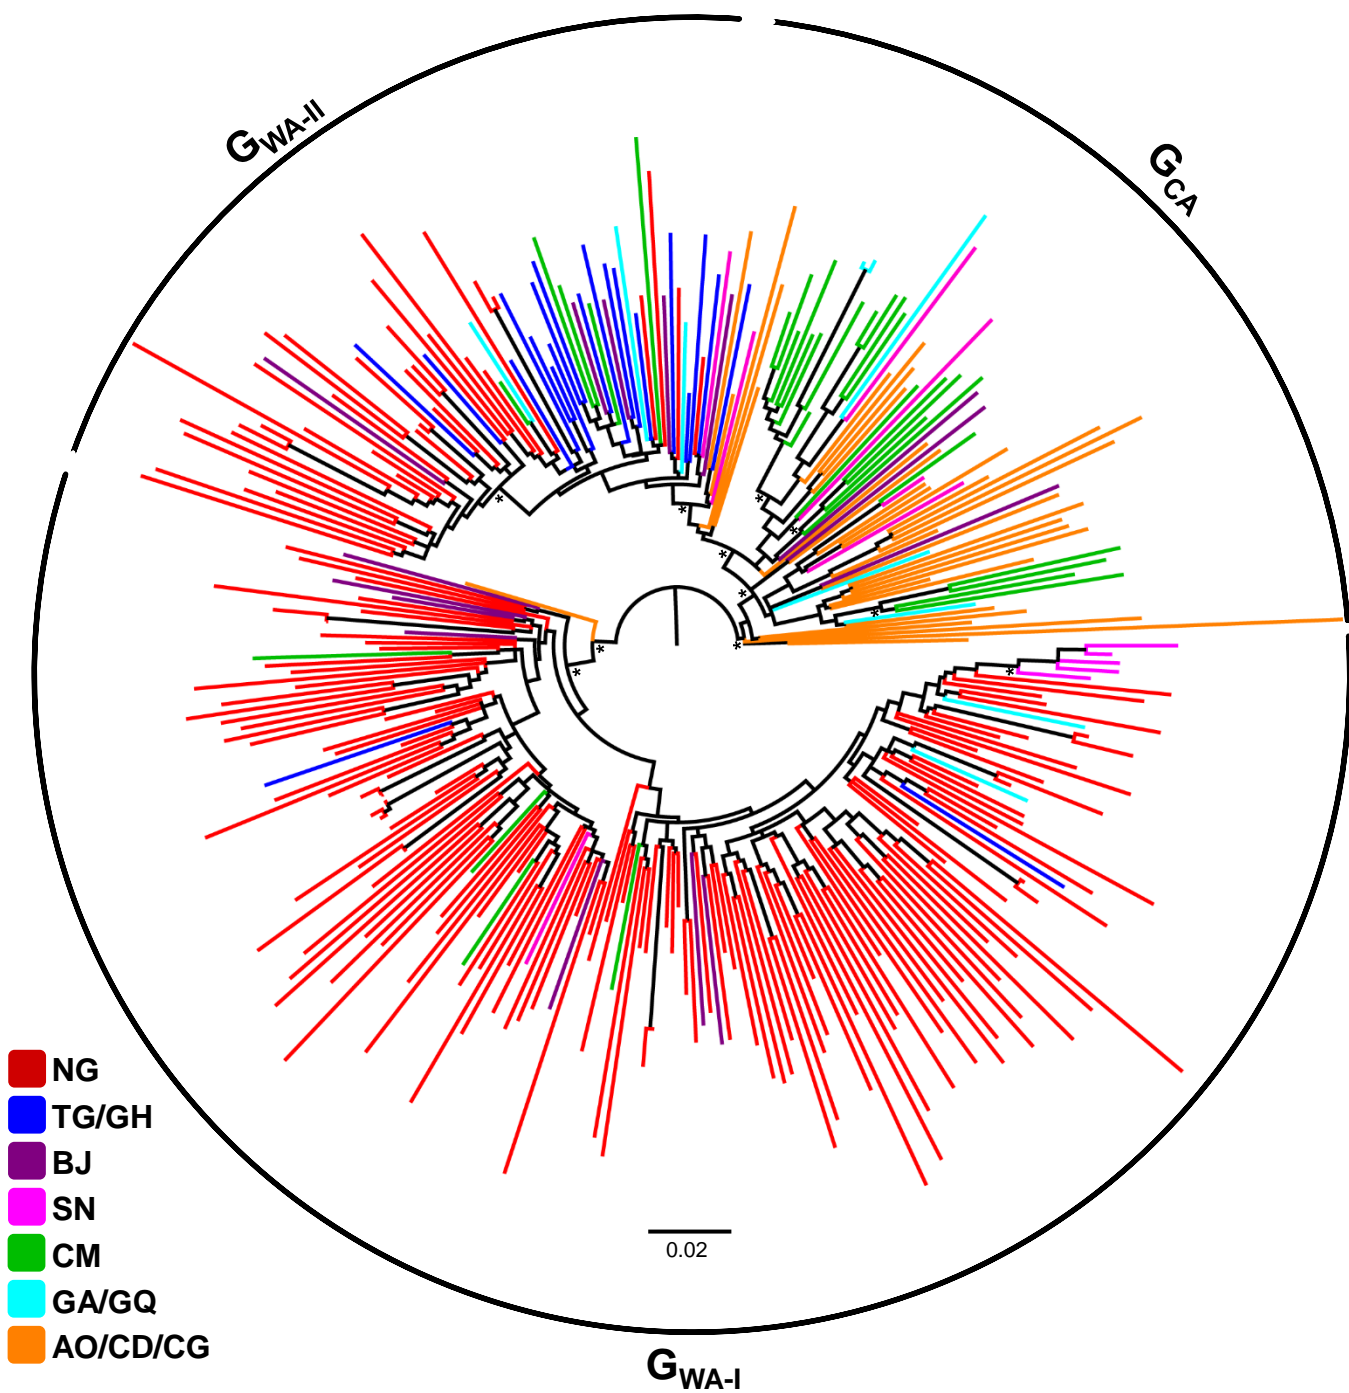

Figure S1
